# Supplementary material for: Correlation Analysis between Microbial Communities and Flavor Compounds during the Post-Ripening Fermentation of Traditional Chili Bean Paste
Source: MDPI journal article supplement (doi:10.3390/foods13081209), 2024-04-16
Supplement: s1 [file s1]

Table S2 Bacterial and fungal alpha diversity of chili bean paste

| Sample | Richness Index            |                             |                           |                             | Diversity Index        |                        |                        |                        | Coverage |       |
|--------|---------------------------|-----------------------------|---------------------------|-----------------------------|------------------------|------------------------|------------------------|------------------------|----------|-------|
|        | ACE                       |                             | Chao1                     |                             | Simpson                |                        | Shannon                |                        | Bacteria | Fungi |
|        | Bacteria                  | Fungi                       | Bacteria                  | Fungi                       | Bacteria               | Fungi                  | Bacteria               | Fungi                  |          |       |
| BP0    | 629.27±78.54 <sup>a</sup> | 1002.05±131.67 <sup>a</sup> | 602.45±66.59 <sup>a</sup> | 1001.01±135.60 <sup>a</sup> | 0.72±0.04 <sup>a</sup> | 0.83±0.02 <sup>a</sup> | 3.15±0.24 <sup>a</sup> | 4.38±0.10 <sup>a</sup> | 0.997    | 0.995 |
| BP6    | 518.52±45.07 <sup>b</sup> | 956.11±83.18 <sup>b</sup>   | 510.81±44.39 <sup>b</sup> | 901.50±92.44 <sup>b</sup>   | 0.90±0.02 <sup>a</sup> | 0.78±0.08 <sup>b</sup> | 4.70±0.33 <sup>a</sup> | 4.11±0.74 <sup>b</sup> | 0.999    | 0.996 |

Note: Different lowercase letters in the same column represent significant differences between samples ( $p < 0.05$ )
