# Supplementary figures and images for: Correlation Analysis between Microbial Communities and Flavor Compounds during the Post-Ripening Fermentation of Traditional Chili Bean Paste
Source: MDPI journal article supplement (doi:10.3390/foods13081209), 2024-04-16

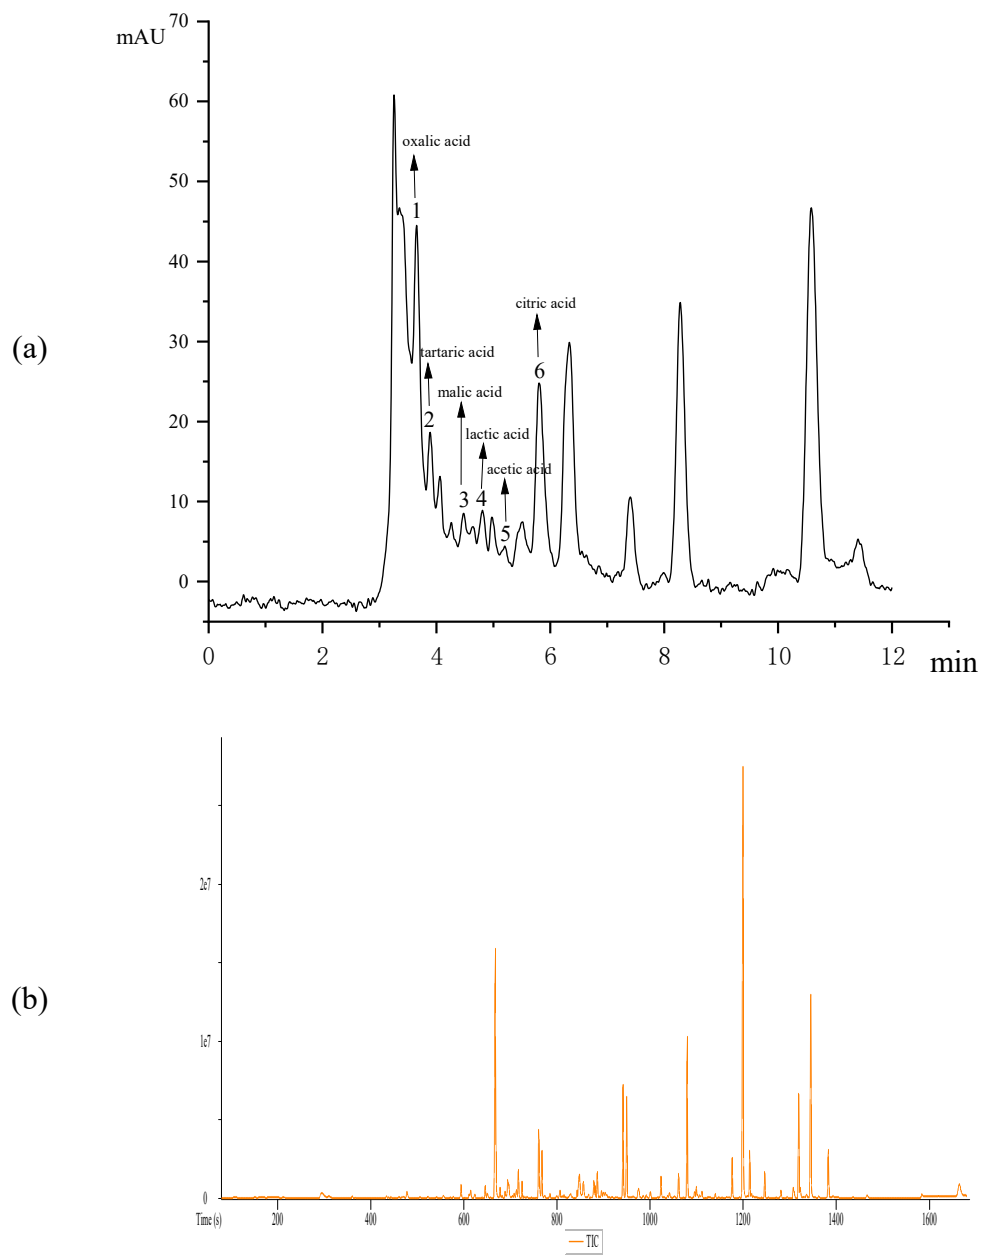

Figure S1. HPLC (a) and GC-MS (b) chromatograms of BP6

Supplement: s1 [file s1]
